# Supplementary material
Source: Research Square preprint supplement (doi:10.21203/rs.3.rs-9330572/v1)
Supplement: Supplementary file 1 [file a01ca0df9d72a45ed52b0409.docx]

| Sl No. | Commercial formulation | Trade name | Manufacturer |
| --- | --- | --- | --- |
| 1 | Profenofos 50% EC | Curacron | Syngenta |
| 2 | Emamectin benzoate 5% SG | Proclaim | Crystal Crop Protection |
| 3 | Spinetoram 11.7% SC | Delegate | Dow Agro Sciences |
| 4 | Indoxacarb 14.5% SC | King Doxa | Gharda Chemicals Ltd. |
| 5 | Lambda cyhalothrin 5% EC | Super Raunak | Sun Pesticide Pvt. Ltd. |
| 6 | Fipronil 5% SC | Efil | Sumitomo Chemical India Ltd. |

**Supplementary Table 1.** List of insecticides used in present study along with trade names and manufacturer
